# Supplementary material for: Bovine milk-derived extracellular vesicles prevent gut inflammation by regulating lipid and amino acid metabolism
Source: Royal Society of Chemistry journal article supplement (doi:10.1039/d2fo03975c), 2023-01-01
Supplement: d2fo03975c2.xlsx [file d2fo03975c2.xlsx]

## Sheet: Sheet1
Metabolites	Compound ID	Super Class	Class	Sub Class	Formula	VIP	P-value	FC	DSS+mEVs1	DSS+mEVs2	DSS+mEVs3	DSS+mEVs4	DSS+mEVs5	DSS+mEVs6	DSS1	DSS2	DSS3	DSS4	DSS5	DSS6
Cer(d18:1/24:1(15Z))	LMSP02010009	Lipids and lipid-like molecules	Sphingolipids	Ceramides	C42H81NO3	1.46309	0.00670514	2.53896	7397.58	7621.6	9431.36	8462	6127.22	16324.4	2523.55	2729.57	2772.36	2663.96	4286.88	6829.52
PGP(18:0/18:0)	HMDB0013504	Lipids and lipid-like molecules	Glycerophospholipids	Glycerophosphoglycerophosphates	C42H84O13P2	1.01861	0.025735	2.16215	3553.1	5245.41	10520.6	11775.3	6118.33	5493.21	2652.18	4432.19	4155.12	3794.84	4167.77	549.512
Oxitropium	1676	Unclassified	Unclassified	Unclassified	C19H25NO4	1.00779	0.0156594	2.08426	3334.34	4810.99	6585.52	5200.1	9589.07	4079.06	1377	1991.45	4112.14	2209.43	3153.75	3276.67
Nb-Palmitoyltryptamine	95277	Organoheterocyclic compounds	Indoles and derivatives	Indoles	C26H42N2O	1.46666	0.0368147	1.83455	27560	18387.3	22141.6	9977.25	13472.5	10346.9	13700.9	6105.21	11339.2	5967.84	6210.86	12213.1
C17 Sphinganine	41558	Lipids and lipid-like molecules	Sphingolipids	Sphingoid bases	C17H37NO2	1.19293	0.0116339	1.81161	16376.8	12990.1	13039	9744.04	7801.77	7034.06	6433.57	3943.83	5666.1	8935.38	6922.91	5074.15
Pristanic acid	LMPR0104010022	Lipids and lipid-like molecules	Prenol lipids	Diterpenoids	C19H38O2	1.23382	0.0118846	1.80345	17250.3	14964.3	11288.3	9612.04	9051.76	7288.11	6877.61	4068.42	6222.88	8963.49	6342.06	6037.71
Isopentenyladenosine-5'-diphosphate	64082	Unclassified	Unclassified	Unclassified	C15H23N5O10P2	1.40677	0.00823269	1.77317	7117.46	10418.1	14587.4	11867.7	17160.8	10482.6	5344.49	6996.01	8432.09	4616.56	6308.05	8701.6
Nalbuphone	1400	Unclassified	Unclassified	Unclassified	C21H25NO4	3.98789	0.00968629	1.77286	62119.2	96261.2	127753	89386.2	132551	80891.6	37793.4	56675	79123.1	40106.9	42963	75547.7
Forasartan	85498	Organoheterocyclic compounds	Pyridines and derivatives	Phenylpyridines	C23H28N8	1.16958	0.00411841	1.73473	9363.66	6017.81	11803.8	12414.4	7652.35	8784.03	5982.88	6120.14	5989.79	5893.9	3979.36	4336.44
PC(P-15:0/0:0)	40399	Lipids and lipid-like molecules	Glycerophospholipids	Glycerophosphocholines	C23H48NO6P	1.75815	0.00541385	1.71959	16895	12085	26617.6	16629.7	24052.7	23008.6	14197.2	12257.6	11770.8	9296.39	10766.1	11082.3
PA(22:4(7Z,10Z,13Z,16Z)/14:0)	LMGP10010788	Lipids and lipid-like molecules	Glycerophospholipids	Glycerophosphates	C39H69O8P	2.73993	0.047715	1.71128	37147.7	83913.7	98976	45652.7	68546.2	45418.4	26364.6	41780.1	58033.5	24674.1	23189.9	47811.6
DHA	LMFA01030185	Lipids and lipid-like molecules	Steroids and steroid derivatives	Androstane steroids	C22H32O2	3.40114	0.0106955	1.69504	57795.6	75982.8	110251	67136.3	98339.1	60443.6	34780.3	51939.1	61582	35117.4	33807.8	60022.7
Carbidopa-levodopa	66560	Unclassified	Unclassified	Unclassified	C19H25N3O8	2.2063	0.00174786	1.65319	20646.2	27764.3	34461	28570.8	36934.4	28228.7	15054.4	17795.5	21232.6	14186.1	15643.7	22914.5
N-(1-Deoxy-1-fructosyl)isoleucine	HMDB0039780	Organic acids and derivatives	Carboxylic acids and derivatives	Amino acids, peptides, and analogues	C12H23NO7	1.03294	0.0358619	1.6339	8103.61	11924.4	17154	8044.71	9189.72	7345.92	4218.41	5042.67	5746.34	8021.93	6909.39	7861.84
PC(20:3(8Z,11Z,14Z)/20:4(5Z,8Z,11Z,14Z))	HMDB0008410	Lipids and lipid-like molecules	Glycerophospholipids	Glycerophosphocholines	C48H82NO8P	18.3529	0.00342108	1.62399	1.56386e+06	2.0086e+06	2.30163e+06	2.02286e+06	2.42901e+06	2.38159e+06	1.34255e+06	1.26925e+06	1.6597e+06	1.12118e+06	641009	1.79121e+06
Oxomemazine	HMDB0240230	Organoheterocyclic compounds	Benzothiazines	Phenothiazines	C18H22N2O2S	1.5945	0.0413684	1.59976	16867.2	17531	35280.1	19362.8	31369.8	20832.2	18723.5	22912.4	12798	11514.8	11308.4	11032.9
N-Nitrosothialdine	87478	Organoheterocyclic compounds	Azacyclic compounds	Dithiazinanes	C6H12N2OS2	1.09995	0.0452826	1.54893	4655.73	14511.4	15146	10676.8	13894.5	17137.8	9347.48	5335.72	7330.9	10028.6	9679.51	7358.29
PA(16:0/22:2(13Z,16Z))	81364	Lipids and lipid-like molecules	Glycerophospholipids	Glycerophosphates	C41H77O8P	3.08208	0.000147223	1.54061	68050.9	62818.2	71271.2	71939.3	53418.4	58179.6	41093	38118.1	43238.7	33272.5	45433.4	49185.8
Fructoselysine	71227	Unclassified	Unclassified	Unclassified	C12H24N2O7	1.07226	0.00809459	1.53898	8991.42	7198.35	13525.2	8866.43	9250.55	9889.61	8110.31	7322.45	5970.08	5893.1	4194.27	6016.19
6-Nitrochrysene	HMDB0247097	Unclassified	Unclassified	Unclassified	C18H11NO2	1.38869	0.00303196	1.50587	16432	12462.3	15733.5	17125.2	14449.7	13392.2	7017.98	9912.68	6674.4	11770.5	11047.9	13073.8
Stachyoside A	93697	Lipids and lipid-like molecules	Prenol lipids	Terpene glycosides	C21H34O15	1.09603	0.00640266	1.49513	7039.63	6931.09	9152.21	10641.1	12024.1	8886.92	5589.52	6441.38	5643.68	5467.75	5842	7584.34
Serylglutamic acid	HMDB0029038	Organic acids and derivatives	Carboxylic acids and derivatives	Amino acids, peptides, and analogues	C8H14N2O6	1.88006	2.25666e-05	1.43812	21870.7	24271.1	27694	26409.3	25737.4	26926.3	15006.8	18930.1	18259.8	17403.2	17931.8	18793.7
Teinemine	LMST01150010	Lipids and lipid-like molecules	Sterol Lipids	Sterols	C27H45NO2	4.01288	9.21042e-05	1.4301	117023	133331	124777	114002	122806	132565	75597.3	74703.3	80191.6	88478.1	105241	96384.5
N-(17-hydroxy-9,12-octadecadienoyl)-glutamine	LMFA08020215	Lipids and lipid-like molecules	Fatty Acyls	Fatty amides	C23H40N2O5	1.48456	0.00974114	1.42703	21252.9	23786.2	27942.2	31652.6	22109.4	20615.7	23228.4	15879.4	14503.8	20042.9	14745.5	14862.4
PROLI NONOate	62983	Unclassified	Unclassified	Unclassified	C5H9N3O4	2.10621	0.0284606	1.42412	49016.1	53065.2	66085.5	52541.3	48292	41156.1	21360.8	31728.8	23692	47421.6	46840.4	46744.2
12-amino-dodecanoic acid	35924	Lipids and lipid-like molecules	Fatty Acyls	Fatty Acids and Conjugates	C12H25NO2	1.58208	0.0287469	1.37857	24633.4	17138.1	26624.4	34719.5	35054.8	27583.3	23832.8	22210.3	17959.2	19691	16061.3	20480.8
(a-D-mannosyl)2-b-D-mannosyl-N-acetylglucosamine	HMDB0006537	Organic oxygen compounds	Organooxygen compounds	Carbohydrates and carbohydrate conjugates	C26H45NO21	1.13198	0.0333422	1.37819	16012.9	11242.4	16531.6	13105.1	14878.7	13220	12355.6	11552.8	6022.43	10312.4	6837.35	14587.8
(4E,7E,10Z,13E,16E,19E)-docosa-4,7,10,13,16,19-hexaenoic acid	64830	Unclassified	Unclassified	Unclassified	C22H32O2	15.0408	0.0278817	1.3767	1.85008e+06	3.09964e+06	3.32715e+06	2.1976e+06	2.92507e+06	2.32704e+06	1.67599e+06	2.11045e+06	2.4414e+06	1.61152e+06	1.50758e+06	2.07643e+06
Bambuterol	HMDB0015478	Benzenoids	Benzene and substituted derivatives	Phenoxy compounds	C18H29N3O5	1.1982	0.0275748	1.35536	12530.9	20692	19651.3	14373.3	18425.9	15885	10311.9	14412.1	16490.5	10661.1	9456.49	13598.7
Formononetin	HMDB0005808	Phenylpropanoids and polyketides	Isoflavonoids	O-methylated isoflavonoids	C16H12O4	1.66756	0.0204082	1.35229	21769	34206.5	32493.3	30280	38271.4	29508.3	19650.2	26465.5	30022.3	20775.2	17626.7	23395.7
N-Acetyl-5-hydroxysulfapyridine	2554	Unclassified	Unclassified	Unclassified	C13H13N3O4S	1.07178	0.0090903	1.34308	9924.96	13788.5	16330.7	14395.2	13295.3	14371.9	11029.4	12848	9295.65	9096.5	10442.6	8420.88
LysoPE(0:0/20:3(5Z,8Z,11Z))	HMDB0011485	Lipids and lipid-like molecules	Glycerophospholipids	Glycerophosphoethanolamines	C25H46NO7P	1.32069	0.0151462	1.33341	17222.5	17507.3	22131.4	18371.8	24775.3	17926.2	12528.3	11797.5	18677.2	14574	13551.9	17316.9
SM(d18:2(4E,14Z)/24:0)	HMDB0240635	Lipids and lipid-like molecules	Sphingolipids	Phosphosphingolipids	C47H93N2O6P	24.018	0.000106717	1.32732	5.74523e+06	5.87287e+06	5.76726e+06	5.24969e+06	4.86153e+06	5.75057e+06	3.60913e+06	3.95059e+06	4.17807e+06	4.18249e+06	4.63056e+06	4.49741e+06
Piritramide	HMDB0041990	Benzenoids	Benzene and substituted derivatives	Diphenylacetonitriles	C27H34N4O	1.38008	0.0018494	1.31703	20567	21613.4	24136.5	19674.5	16697.8	21503.5	14615.4	15465.1	14249	16040.5	15329	18598.2
1-pentadecanoyl-glycero-3-phosphate	HMDB0062324	Lipids and lipid-like molecules	Glycerophospholipids	Glycerophosphates	C18H37O7P	4.38853	0.0287875	1.30895	189233	291253	305417	221527	288274	234636	173361	217777	245272	170430	154934	207364
PC(22:2(13Z,16Z)/22:2(13Z,16Z))	HMDB0008612	Lipids and lipid-like molecules	Glycerophospholipids	Glycerophosphocholines	C52H96NO8P	2.24842	0.000828033	1.30647	50694.8	56886.1	65730.9	61606.3	59041.8	59937.9	52117.9	45217.1	46803.8	47067.2	43075.6	36599
PC(22:5(4Z,7Z,10Z,13Z,16Z)/16:0)	HMDB0008659	Lipids and lipid-like molecules	Glycerophospholipids	Glycerophosphocholines	C46H82NO8P	22.619	0.00931214	1.2993	5.54136e+06	7.11764e+06	7.672e+06	5.98062e+06	7.32191e+06	6.90558e+06	3.80987e+06	4.85562e+06	5.69259e+06	5.93012e+06	6.0479e+06	4.86454e+06
LysoPE(18:3(9Z,12Z,15Z)/0:0)	HMDB0011509	Lipids and lipid-like molecules	Glycerophospholipids	Glycerophosphoethanolamines	C23H42NO7P	1.19742	0.0161086	1.29913	15661.4	16216.1	14376.4	15928.9	22564.4	16796.8	12661.2	14365.9	15505.7	11251.5	11682.6	12696.3
Bisabolane skeleton	53372	Unclassified	Unclassified	Unclassified	C15H30	1.34445	0.0462082	1.29733	21951.7	24318.3	22479.9	24573.7	30881.6	17769.8	13061.9	19455.5	21965.3	15806.6	15936.3	23210.9
Pentadecylic acid(d3)	LMFA01010045	Unclassified	Unclassified	Unclassified	C15H27D3O2	1.30531	0.000666942	1.29319	19957.3	22368.5	19578.9	17184.7	17538.5	19885.1	16779.3	13238	15297.9	14599.2	14655.2	15527.4
Sugiol	91640	Lipids and lipid-like molecules	Prenol lipids	Diterpenoids	C20H28O2	2.38288	0.00272369	1.28676	52749.5	53285	62376.8	65225.7	74032.2	63370.8	43732.7	48266.4	49441	45096.2	50342.9	51474
Scillirosidin	LMST01130002	Lipids and lipid-like molecules	Sterol Lipids	Sterols	C26H34O6	1.82853	0.0116368	1.27663	44681.7	44243.7	44628.1	37582.9	55798.4	37016	39511.3	36044.8	33431.2	33261.9	29337.8	35168.1
9-Azabicyclo[3.3.1]nonane, 1H-indazole-3-carboxamide deriv.	3144	Unclassified	Unclassified	Unclassified	C18H24N4O2	1.64158	0.031768	1.26337	40995.6	35706.7	61407.2	44911.4	43565.3	47623.5	37157.6	41728.9	35446.6	37557.4	32445.6	32710.4
7-oxo-8-amino-nonanoic acid	LMFA01060168	Lipids and lipid-like molecules	Fatty Acyls	Fatty Acids and Conjugates	C9H17NO3	1.68219	5.50088e-05	1.26058	29590.5	29484.6	30205.1	29093.6	28901.2	31372.9	24300.2	21969.1	22313.8	22596.4	23033.3	27505.8
5-Hepteneoylglycine	HMDB0094731	Organic acids and derivatives	Carboxylic acids and derivatives	Amino acids, peptides, and analogues	C9H15NO3	1.51505	0.00174348	1.24895	27875.2	27567.3	29688.7	28033.2	26910	28495.1	24504.5	20805.3	19066.2	20578.5	22438.4	27576.1
Diplosporin	87137	Organoheterocyclic compounds	Pyrans	Pyranones and derivatives	C12H16O4	1.35248	0.000555664	1.24879	22308.6	20838.7	22105.2	21242.9	21053.5	21732.4	18547.4	14807	16209.1	16274.4	17142.7	20544.4
Di-n-octyl phthalate	69894	Unclassified	Unclassified	Unclassified	C24H38O4	1.82408	0.00157504	1.24657	36501.9	39638	40023.2	40751.7	39501.1	48103	33879.2	33373.7	29290.6	29940.4	34665.4	35004.7
6,7-Dihydro-4-(hydroxymethyl)-2-(p-hydroxyphenethyl)-7-methyl-5H-2-pyrindinium	89304	Benzenoids	Phenols	1-hydroxy-2-unsubstituted benzenoids	C18H22NO2+	2.78158	0.0135114	1.23883	117436	109200	155609	141543	123017	134817	114020	119742	95114.3	112323	96664.9	93073.2
Polidocanol	HMDB0256665	Unclassified	Unclassified	Unclassified	C30H62O10	2.33356	0.00612484	1.23835	71510.8	59926.9	81198.5	68654.2	79626.5	82082	64238.7	64546.8	52806.3	58456.4	54962.2	62721.5
8-CYCLOPENTYLTHEOPHYLLINE	44461	Unclassified	Unclassified	Unclassified	C12H16N4O2	1.51374	0.00032563	1.23564	25425.1	27331.3	31083.4	27921.5	27900.8	30230.1	21380.5	22943.4	21563.3	22522.7	24597.8	24485.5
11-nitro-1-undecene	HMDB0062669	Organic 1,3-dipolar compounds	Allyl-type 1,3-dipolar organic compounds	Organic nitro compounds	C11H21NO2	1.73341	0.0117422	1.23028	38268.2	39839.7	48668.3	43005.5	43675.3	51909.6	41415	37599.5	31797.6	32706.9	32789.7	39387.2
Cinobufagin	HMDB0250266	Unclassified	Unclassified	Unclassified	C26H34O6	1.53073	0.0336183	1.22476	39801.4	33200	43074.1	37175.7	52825.5	39051.4	36486.9	37421	30832.6	34723.2	29647.1	31032.9
β-lapachone	68281	Unclassified	Unclassified	Unclassified	C15H14O3	2.26205	0.00399655	1.22476	69510.6	66865.8	65258.6	71658.4	79476.2	70746.8	68385.1	62031.9	55111.4	52963.2	48858	58447.1
(5alpha,10alpha)-3,7(11)-Eudesmadien-2-one	90429	Lipids and lipid-like molecules	Prenol lipids	Sesquiterpenoids	C15H22O	1.34368	0.000814532	1.22413	24634.6	21363.8	26252.1	24243.3	23712.2	24338.8	22221.9	19839.6	18213.1	17966.4	18954.6	20883.8
MG(16:1(9Z)/0:0/0:0)	62347	Lipids and lipid-like molecules	Glycerolipids	Monoradylglycerols	C19H36O4	1.19076	0.00389471	1.22366	15805	17521.6	18490.2	20360.6	21441.9	19685.6	15465.4	15630.3	14522.3	14471.1	15342.8	17163.5
N-Undecanoylglycine	HMDB0013286	Organic acids and derivatives	Carboxylic acids and derivatives	Amino acids, peptides, and analogues	C13H25NO3	2.71847	0.0499768	1.22039	176259	152121	138907	142409	125885	135048	152822	128047	94662.9	99104.5	105276	133491
Na-Hexanoyl-Nb-inosityltryptophan	HMDB0039501	Organic acids and derivatives	Carboxylic acids and derivatives	Amino acids, peptides, and analogues	C23H32N2O8	2.25805	0.0495076	1.21568	71541.2	101590	104784	90178.1	109241	90855.3	70485	88694.3	96144	69754	63981.5	78326
Dimethyl phthalate	68931	Unclassified	Unclassified	Unclassified	C10H10O4	1.596	0.00235343	1.21255	37251.7	38879.1	36587.3	35096.9	33443.4	37743.5	32218.1	28545.2	26256.3	28978.2	28887.8	35727.5
Pregabalin	85349	Organic acids and derivatives	Carboxylic acids and derivatives	Amino acids, peptides, and analogues	C8H17NO2	2.03841	0.0025351	1.20933	59937.9	56769.4	58084.7	63279.3	62129.8	63317.4	57539.7	42997.1	47436.1	45137.8	52281.5	55201.8
2-Methylimidazole	72981	Unclassified	Unclassified	Unclassified	C4H6N2	3.48327	0.000269414	1.20717	176558	178721	178574	161444	154674	180058	139416	133091	136197	144079	146873	153604
PS(P-16:0/14:1(9Z))	78744	Lipids and lipid-like molecules	Glycerophospholipids	Glycerophosphoserines	C36H68NO9P	1.12459	0.0118199	1.19953	23757	24021.3	22609.6	24572.1	18022	24702	18809.7	17161	17637.7	19739.8	19527.3	21906.3
(E)-2-Hexenyl (E)-2-octenoate	LMFA07010590	Lipids and lipid-like molecules	Fatty Acyls	Fatty esters	C14H24O2	3.22713	0.00111855	1.18949	162876	145429	149998	166654	154015	172733	143579	141467	119973	130445	128533	136098
(E)-3-methylglutaconic acid	45911	Lipids and lipid-like molecules	Fatty Acyls	Fatty Acids and Conjugates	C6H8O4	1.61732	0.00123828	1.18439	37027.7	38945.9	41148.2	41865.5	41027.1	43551.4	32405.1	31435.6	32296.3	35414.2	36021.6	38074.5
Tranexamic acid	2893	Organic acids and derivatives	Carboxylic acids and derivatives	Amino acids, peptides, and analogues	C8H15NO2	2.04029	0.00666167	1.18303	76853.1	70738.5	74183.1	73977	77533.7	72807.3	73980.6	54112.1	58795.4	55649.5	66308.4	68230.2
10,12,14-octadecatrienoic acid	LMFA01030154	Lipids and lipid-like molecules	Fatty Acyls	Fatty Acids and Conjugates	C18H30O2	4.07626	0.00755779	1.18148	256986	264184	316509	334167	302129	307221	250429	265503	229927	238561	263312	259861
4-Methyl-L-glutamate	63279	Unclassified	Unclassified	Unclassified	C6H11NO4	1.20672	1.14431e-05	1.18135	19704.9	19765.8	19901	21180.9	19959.3	21594.7	17037	16870.2	16936.5	17239.7	17088.6	18189.8
(-)-Carvomenthone	HMDB0034969	Lipids and lipid-like molecules	Prenol lipids	Monoterpenoids	C10H18O	1.53603	0.0152896	1.17764	48957.1	42291.8	44493.6	50190.9	47395.1	51260.9	49323.9	40827.6	34814	39652.7	37558.5	39484.9
N-Nonanoylglycine	HMDB0013279	Organic acids and derivatives	Carboxylic acids and derivatives	Amino acids, peptides, and analogues	C11H21NO3	1.23311	0.0292498	1.17725	27098.3	30016.4	29756.9	33447.6	28977.3	34124.5	25491.8	30859.7	21067.8	23131.4	27894.8	27359.5
Fenothiocarb	68826	Unclassified	Unclassified	Unclassified	C13H19NO2S	1.43784	7.43048e-06	1.17722	29928.6	31308.6	32037.3	30129.1	31860.4	29657.9	26589.5	24674	26312.7	25728.9	26920.7	26857.7
Oleic acid	HMDB0000207	Lipids and lipid-like molecules	Fatty Acyls	Fatty acids and conjugates	C18H34O2	2.58448	0.0304124	1.17548	117633	128095	109418	124733	146121	122731	81809.8	112618	115601	101593	107518	117818
19-Noretiocholanolone	HMDB0005886	Lipids and lipid-like molecules	Steroids and steroid derivatives	Estrane steroids	C18H28O2	2.15623	0.00173852	1.17384	72752.1	73842.9	86275.9	85237.9	78836.7	82648.3	69026.6	70910.9	60970.8	67514.6	69227.8	70916.8
Butyl salicylate	HMDB0040730	Benzenoids	Benzene and substituted derivatives	Benzoic acids and derivatives	C11H14O3	1.03989	0.0144836	1.17199	22893.6	20142.5	24508.4	19363.5	21920.1	20853.5	19885.4	18859.6	15464.4	18171.5	17625.9	20644.4
2-Carboxy-5,7-dimethyl-4-octanolide	87330	Organoheterocyclic compounds	Lactones	Gamma butyrolactones	C11H18O4	1.35118	0.0182075	1.17165	32599.1	42223.1	43956.9	38878	37727.1	39370.2	36216.4	29045.6	34094.3	30693.4	33482.4	36830
Glycine	HMDB0000510	Organic acids and derivatives	Carboxylic acids and derivatives	Amino acids, peptides, and analogues	C6H11NO4	2.01332	7.71695e-05	1.16708	59466.5	59968	60108	63564.2	61724.2	65509.1	54736	51940	50240.1	51881.7	51774.6	56748.3
Piracetam	HMDB0256585	Unclassified	Unclassified	Unclassified	C6H10N2O2	4.562	6.29749e-05	1.16526	314887	324539	347256	338275	326067	351152	294666	282929	270361	279643	293281	297344
(4E,6E,d14:2) sphingosine	53907	Lipids and lipid-like molecules	Sphingolipids	Sphingoid bases	C14H27NO2	1.66978	3.94041e-05	1.16477	45492	46543.8	46670.6	46001.6	46115.3	45196.6	43032.9	38346.5	36570.4	38482.7	40357.1	40183.6
(2R,3R)-heptane-1,2,3-triol	LMFA05000549	Lipids and lipid-like molecules	Fatty Acyls	Fatty alcohols	C7H16O3	3.14528	0.00174287	1.16168	162715	162183	173189	176311	177645	178157	165726	144568	142461	133403	143077	157581
Linoleyl hydroxamic acid	LMFA08020211	Lipids and lipid-like molecules	Fatty Acyls	Fatty amides	C18H33NO2	2.82398	0.00500345	1.16154	138481	137695	162604	164830	149904	152770	129959	137757	116160	125189	131644	139533
All-Trans-3,4-Didehydro-Retinoic acid	41514	Lipids and lipid-like molecules	Prenol lipids	Retinoids	C20H26O2	1.94421	0.00305201	1.15825	66964.3	66557.8	77885.6	77418.1	70181.5	73215.5	64272.4	64739.9	55881.9	60095.8	62230.1	65949.5
Glutamyl-Proline	85741	Organic acids and derivatives	Carboxylic acids and derivatives	Amino acids, peptides, and analogues	C10H15N2O5-	4.43339	6.7852e-05	1.15717	309679	324146	346491	333517	325913	347223	297375	285647	272841	280091	287831	293308
L-Histidinol	HMDB0003431	Organic nitrogen compounds	Organonitrogen compounds	Amines	C6H11N3O	9.8265	6.25757e-05	1.1546	1.56986e+06	1.63295e+06	1.7069e+06	1.63086e+06	1.59602e+06	1.73733e+06	1.45377e+06	1.38678e+06	1.35139e+06	1.41475e+06	1.45522e+06	1.48987e+06
Isoproterenol	852	Benzenoids	Phenols	Benzenediols	C11H17NO3	4.42136	0.00253651	1.15363	335539	342846	388880	365508	363423	392964	333887	310847	294618	306832	307733	343702
Histidylproline diketopiperazine	HMDB0002053	Organic acids and derivatives	Carboxylic acids and derivatives	Amino acids, peptides, and analogues	C12H16N4O2	2.08951	0.000830034	1.14755	77365.7	79939.8	88043.9	89279.8	83464.2	87690.4	76083	73128.8	69139	71199	76262.3	74940.6
(4-Hydroxybenzoyl)choline	HMDB0029559	Benzenoids	Benzene and substituted derivatives	Benzoic acids and derivatives	C12H18NO3+	5.026	8.77496e-05	1.14733	433148	444750	475691	459417	450214	474288	413389	391669	373948	389269	410003	407703
1-O-(2R-methoxy-hexadecyl)-sn-glycerol	LMGL01020039	Lipids and lipid-like molecules	Glycerolipids	Monoradylglycerols	C20H42O4	5.89671	0.00339359	1.14568	635039	664898	774160	716990	720138	737200	621043	642102	573707	593366	636029	641967
Aminocaproic acid	HMDB0001901	Lipids and lipid-like molecules	Fatty Acyls	Fatty acids and conjugates	C6H13NO2	2.21712	6.18371e-05	1.14509	82699.4	85417.7	91195.8	89322.4	86132	91451.9	77589.1	75577.7	73643.6	75183.2	77890.5	79659.9
N,N-dimethylhistidine	44783	Unclassified	Unclassified	Unclassified	C8H13N3O2	4.5556	0.000318781	1.14486	355420	369151	397828	392391	382327	403542	345704	333575	317616	322805	342564	347291
4-Butyl-5-ethylthiazole	HMDB0040065	Organoheterocyclic compounds	Azoles	Thiazoles	C9H15NS	1.95875	1.17788e-05	1.14374	66037.8	69107.8	72177.4	69720.4	67385.9	70376.9	60373.6	58731.5	58778.8	60476.2	62205.4	62111.1
Chrysoidine free base	70207	Unclassified	Unclassified	Unclassified	C12H12N4	3.25936	0.000138338	1.1424	184990	191680	203999	197244	193544	208384	174664	170341	163859	169034	177218	177660
1-Pyrimidinylpiperazine	HMDB0061017	Organoheterocyclic compounds	Diazinanes	Piperazines	C8H12N4	2.79401	2.62602e-05	1.14082	135260	139701	147342	143562	138972	146394	128146	123555	119678	121105	125575	128100
11-deoxy-PGF1α	36139	Unclassified	Unclassified	Unclassified	C20H36O4	3.39308	0.000717494	1.14007	220121	219545	236810	247741	222876	238390	210484	210325	188106	201112	198920	206312
Noscapine	43280	Alkaloids and derivatives	Phthalide isoquinolines	Unclassified	C22H23NO7	2.244	0.00542466	1.13937	105004	104224	110017	99696.5	100947	108867	94888.3	99666.6	82370	87086.1	86213.6	101620
Pirimicarb	HMDB0256598	Unclassified	Unclassified	Unclassified	C11H18N4O2	2.06078	0.0111803	1.1377	113172	127623	113217	105052	101778	107287	104777	90050.1	99006.5	96545.1	94336.8	102548
19-Nor-5-androstenediol	LMST02010050	Lipids and lipid-like molecules	Steroids and steroid derivatives	Estrane steroids	C18H28O2	1.49047	0.00447287	1.13766	44241.4	47908.6	47959.1	45815.6	47311.9	48253	45866.5	42384	40937.3	37880.3	36722.4	43637.1
(2xi,3xi,6E)-3,7-Dimethyl-6-octene-1,2,3,8-tetrol	HMDB0033642	Lipids and lipid-like molecules	Prenol lipids	Monoterpenoids	C10H20O4	1.21259	0.0113484	1.13635	38499.1	39222.6	41579.5	38937.6	38013.2	38433.6	37263	27973	33774.8	34116.5	37070.5	36327.4
17-phenyl-18,19,20-trinor-prostaglandin D2	HMDB0062679	Lipids and lipid-like molecules	Fatty Acyls	Eicosanoids	C23H30O5	4.6401	0.00779333	1.13623	482347	477292	511296	463410	455540	503659	452454	457788	376783	396164	402986	460440
Methionyl-Valine	HMDB0028986	Organic acids and derivatives	Carboxylic acids and derivatives	Amino acids, peptides, and analogues	C10H20N2O3S	2.8514	0.000170544	1.13543	155440	155142	159897	155922	159619	151698	141314	130315	132084	139903	132943	149312
2,2'-Bipyridylamine	96352	Unclassified	Unclassified	Unclassified	C10H9N3	2.47939	0.000200917	1.13405	116533	120547	128653	121958	119682	128885	112331	107556	102263	106132	109583	111362
Butyl 3-O-beta-D-glucopyranosyl-butanoate	98328	Lipids and lipid-like molecules	Fatty Acyls	Fatty acyl glycosides	C14H26O8	2.20621	0.000640769	1.13372	95775.9	102586	106704	95034.9	97521.8	104579	91391.1	86385.3	85202.3	87104.6	87224.1	93863.1
UMBELLIFERONE	44642	Phenylpropanoids and polyketides	Coumarins and derivatives	Hydroxycoumarins	C9H6O3	4.76985	0.000659403	1.13228	461401	474102	468942	457626	454265	476683	443551	401023	381383	398287	399682	442801
9-nitrooctadec-9E-enoic acid	45886	Unclassified	Unclassified	Unclassified	C18H33NO4	1.29134	0.00178191	1.1319	36137.6	38331.8	40876.2	39047.9	37220.1	41282.7	36102.6	34778.7	31190.5	35051.6	34804.8	33828
17R,18S-EpETE	36084	Lipids and lipid-like molecules	Fatty Acyls	Fatty acids and conjugates	C20H30O3	1.81572	0.00209639	1.13117	66763.7	67265.5	67319.2	70011.3	70399.6	73970.2	65745.9	63927.4	55163.7	58787.1	60380.5	63517.8
1-O-(2R-hydroxy-hexadecyl)-sn-glycerol	LMGL01020063	Lipids and lipid-like molecules	Glycerolipids	Monoradylglycerols	C19H40O4	5.32694	0.000622696	1.13057	555144	579227	630401	597804	591931	614018	549356	543005	499924	497759	531001	535359
1,2,3,4-Tetrahydroisoquinoline	HMDB0012489	Organoheterocyclic compounds	Tetrahydroisoquinolines	Unclassified	C9H11N	2.92653	0.000155619	1.12814	170534	177925	184401	174517	171659	185577	163556	154094	149909	154036	159398	162690
Palmitic amide	HMDB0012273	Lipids and lipid-like molecules	Fatty Acyls	Fatty amides	C16H33NO	5.17113	0.00286122	1.12811	569685	611022	662994	651651	629650	663075	580333	568359	515137	547398	587152	559513
2-(5,8-Tetradecadienyl)cyclobutanone	HMDB0037519	Organic oxygen compounds	Organooxygen compounds	Carbonyl compounds	C18H30O	1.32992	0.00396443	1.12667	40888.8	42912.9	47973.8	45138.3	43441.2	44932.1	41577.1	39088	35270.5	38694.3	40845.5	39984.8
Gibberellin A110	HMDB0032010	Lipids and lipid-like molecules	Prenol lipids	Diterpenoids	C20H28O5	1.52521	0.000214365	1.12478	46636.1	49424.2	49133.9	49811.3	50269.8	49164.8	46295.7	42601.6	40708.1	43427.2	43364.9	45377.5
Metoprolol	1250	Benzenoids	Phenols	Tyrosols and derivatives	C15H25NO3	14.1607	0.000225358	1.12455	4.00881e+06	3.97218e+06	4.15306e+06	4.20979e+06	4.20927e+06	4.09686e+06	3.87726e+06	3.62656e+06	3.48884e+06	3.56858e+06	3.50608e+06	3.85258e+06
R-cucujolide III	LMFA07040047	Lipids and lipid-like molecules	Fatty Acyls	Fatty esters	C14H24O2	2.05244	0.00352003	1.12435	88092.2	95423.9	97665.7	96338.8	97687.1	101924	91349.8	90728.7	80399.5	79282.7	84037.2	87505.2
PROPOXUR	44243	Unclassified	Unclassified	Unclassified	C11H15NO3	1.02497	0.0169536	1.1237	25018.6	24264	26960.1	28288.8	25936.8	29194.7	25102.8	24274.4	23001.8	20706	24097.2	24905.1
beta-D-fructose 2,6-bisphosphate	HMDB0304539	Organic oxygen compounds	Organooxygen compounds	Carbohydrates and carbohydrate conjugates	C6H10O12P2-4	4.99327	0.0213741	1.12334	573818	561316	604299	661130	629273	685191	553895	607683	543723	497524	533572	570714
19-hydroxy-PGA2	LMFA03010130	Lipids and lipid-like molecules	Fatty Acyls	Eicosanoids	C20H30O5	1.91253	0.00489859	1.12165	89910.4	93187.7	99220.9	90688.7	92188.5	98271.6	91727.7	82657.6	74368.4	82357	84597.1	86647
Germacrane skeleton	53388	Unclassified	Unclassified	Unclassified	C15H30	1.53727	0.00291312	1.12085	49823.4	48268.4	51783.5	54523.7	54841.1	52405.9	46127	44484.2	45916.3	44544.1	46022.5	50950.3
(R)-Pelletierine	86891	Organoheterocyclic compounds	Piperidines	Unclassified	C8H15NO	1.29732	0.00542826	1.11851	38715.5	37827.1	39696.9	42920.5	40608.7	43820.4	38006.6	34974.5	35532.1	33728.1	37273.8	38265
Momilactone A	53610	Phenylpropanoids and polyketides	2-arylbenzofuran flavonoids	Unclassified	C20H26O3	1.45782	0.00283818	1.11716	49795	50054.5	52596.4	54168.1	51247.4	55304.6	48344.6	48276.3	41639.7	46924.9	46862.3	48275.2
9,12,15-Octadecatrien-1-ol	LMFA05000216	Lipids and lipid-like molecules	Fatty Acyls	Fatty alcohols	C18H32O	8.33945	0.00322388	1.11671	1.63972e+06	1.73989e+06	1.89934e+06	1.85579e+06	1.77398e+06	1.8496e+06	1.68593e+06	1.62465e+06	1.48279e+06	1.56299e+06	1.64617e+06	1.63141e+06
N-Butylscopolamine metabolite	2399	Unclassified	Unclassified	Unclassified	C12H21NO2	3.92481	0.000575302	1.11653	360890	368258	384629	354605	373053	370569	346820	310221	311535	330024	339691	342848
11-Hydroxy-9-tridecenoic acid	HMDB0035881	Lipids and lipid-like molecules	Fatty Acyls	Fatty acids and conjugates	C13H24O3	1.95443	0.00215172	1.11653	88023.3	84407.6	88411.5	93397.6	91776.2	88382.6	85952.9	79316.5	76267.7	76796.3	75415.8	84876
(all-E)-3,5,7-Tridecatriene-9,11-diyn-1-ol	HMDB0038526	Lipids and lipid-like molecules	Fatty Acyls	Fatty alcohols	C13H14O	1.13614	0.00127204	1.11391	31223.8	30590.1	32871.5	32306.2	31180.6	34765.4	30686.7	29008.4	29004	28288.5	27915.9	28304.5
Gabapentin	HMDB0005015	Organic acids and derivatives	Carboxylic acids and derivatives	Amino acids, peptides, and analogues	C9H17NO2	9.73793	0.0237541	1.11252	2.54436e+06	2.58615e+06	3.01921e+06	2.78005e+06	2.74907e+06	3.02472e+06	2.69084e+06	2.4835e+06	2.34557e+06	2.42992e+06	2.3638e+06	2.70051e+06
beta-Ionone	69413	Lipids and lipid-like molecules	Prenol lipids	Sesquiterpenoids	C13H20O	2.05864	0.00224426	1.11181	102154	98318.9	103586	107463	106664	102849	100306	92065.9	88656.4	91080.1	87562.7	98912
C9:2n-2,4	74107	Lipids and lipid-like molecules	Fatty Acyls	Fatty Acids and Conjugates	C9H14O2	4.61059	0.037133	1.10857	632696	640620	753901	678234	668046	743578	673239	609948	573770	598615	581360	676925
(4OH,8Z,t18:1) sphingosine	53909	Unclassified	Unclassified	Unclassified	C18H37NO3	3.42085	0.0180466	1.09754	361421	352020	373038	388101	369301	397415	338141	353630	297669	335100	355157	362413
Acetylagmatine	65718	Unclassified	Unclassified	Unclassified	C7H16N4O	1.03138	0.0387613	1.09704	35734	41397.9	43970.5	44007.4	43506.4	45603.6	39504.7	40222.1	38041.3	37841.5	40017	36106.1
N-tetradecanoyl-homoserine lactone	LMFA08030038	Lipids and lipid-like molecules	Fatty Acyls	Fatty amides	C18H33NO3	4.13924	0.00130615	1.0961	497837	513372	547097	508229	518745	515500	507251	463541	452738	467773	462834	474772
Prenalterol	HMDB0256762	Unclassified	Unclassified	Unclassified	C12H19NO3	1.6788	0.0135195	1.09581	83251.3	97419.7	95431	95960.5	98035.7	96575	91995.9	86002.2	88175.6	80350	84962.2	85643
(±)-(Z)-2-(5-Tetradecenyl)cyclobutanone	HMDB0037543	Organic oxygen compounds	Organooxygen compounds	Carbonyl compounds	C18H32O	3.81178	0.0462276	1.09509	601218	619217	623709	564871	557786	632581	621199	536113	489890	515668	547555	576399
4-Hexyl-2,5-dimethyloxazole	HMDB0037890	Organoheterocyclic compounds	Azoles	Oxazoles	C11H19NO	1.89713	4.19546e-06	1.09455	94205.1	95307.3	97046.5	93508.6	92176.6	96160.1	87718.7	83942.2	86677.6	86848.3	86883.6	87232.2
Sorbitan palmitate	LMFA07011019	Lipids and lipid-like molecules	Fatty Acyls	Fatty acid esters	C22H42O6	2.48068	0.00825881	1.09205	213133	208320	223010	210031	200802	218846	208043	200135	178409	194434	185743	199981
Spiroxamine	HMDB0258432	Unclassified	Unclassified	Unclassified	C18H35NO2	1.26922	0.00951455	1.09144	50753	46190.8	48967.2	52541.3	55250.6	50929.5	45534.9	46601.9	46969.8	47699.5	44979.9	47325.7
2,6,6-Trimethyl-2-cyclohexene-1,4-dione	94747	Organic oxygen compounds	Organooxygen compounds	Carbonyl compounds	C9H12O2	1.99153	0.0223103	1.08747	139994	137200	148656	154690	143956	156100	145581	131170	132294	124398	136109	140213
(E)-2-Butenyl-4-methyl-threonine	69263	Unclassified	Unclassified	Unclassified	C9H17NO3	3.28539	0.0178391	1.08708	371322	365707	391448	406798	388796	409168	385807	348523	350909	327072	364105	369925
3-Methylcyclopentadecanone	HMDB0034181	Organic oxygen compounds	Organooxygen compounds	Carbonyl compounds	C16H30O	4.27476	0.00937534	1.08696	623013	623110	665852	635725	646795	681208	646470	611404	557594	577763	575476	596931
Dehydrocurdione	HMDB0035407	Lipids and lipid-like molecules	Prenol lipids	Sesquiterpenoids	C15H22O2	1.05755	0.0149969	1.08392	43539.9	44767.1	45910.2	46243	44730.3	49092.4	46289.5	43058	40612.8	41950.7	40702.3	40434.2
Benzothiazole	HMDB0032930	Organoheterocyclic compounds	Benzothiazoles	Unclassified	C7H5NS	2.9998	0.00124247	1.08356	308080	316394	316139	298965	291587	308097	283952	270147	277500	282006	288994	294825
N-methyl-Gabapentin	2992	Unclassified	Unclassified	Unclassified	C10H19NO2	1.0869	0.0272369	1.08333	49439.6	46697.9	50314.9	50119.7	50789.3	51537	51000.4	43854.3	41851.2	44677	47499.4	47024.6
(2E,4E)-2,4-Octadien-1-ol	HMDB0040151	Lipids and lipid-like molecules	Fatty Acyls	Fatty alcohols	C8H14O	1.01218	0.0495595	1.07998	51280.9	46858.2	53467.8	52738.3	47645.3	53279.8	49780.1	43989.8	43040.9	47559.8	48528.4	49763.8
(1(10)E,4E,6a,9b)-9-(2-Methylbutanoyloxy)-1(10),4,11(13)-germacratrien-12,6-olide	87627	Lipids and lipid-like molecules	Prenol lipids	Terpene lactones	C20H28O4	1.36484	0.0267935	1.07574	80637.7	81666.4	87171.7	84033.1	78945.1	87993.3	80076.6	78439.2	69836.8	76603.2	78290	81966.8
(2E,4Z)-2-hydroxy-6-oxohexa-2,4-dienoic acid	LMFA01030926	Lipids and lipid-like molecules	Fatty Acyls	Fatty Acids and Conjugates	C6H6O4	1.86676	0.0102768	1.07297	136399	140964	143632	145787	142460	146757	142936	130491	126087	130770	128480	139018
Trifluoroacetic acid	HMDB0014118	Organic acids and derivatives	Carboxylic acids and derivatives	Alpha-halocarboxylic acids and derivatives	C2HF3O2	1.86187	0.0107989	1.0718	150532	140125	145562	135683	138190	141444	134671	137913	131204	125822	127247	137634
4E,14Z-Sphingadiene	LMSP01080002	Lipids and lipid-like molecules	Sphingolipids	Sphingoid bases	C18H35NO2	1.91409	0.0226569	1.06974	191575	194723	186411	193183	177293	182945	186435	174169	163152	178044	167947	182973
(±)-2-Dodecylcyclobutanone	HMDB0037544	Organic oxygen compounds	Organooxygen compounds	Carbonyl compounds	C16H30O	2.08444	0.0499513	1.06811	248483	232269	254154	239852	236875	256366	251479	238259	214026	225628	216173	228819
Protionamide sulfoxide	2180	Unclassified	Unclassified	Unclassified	C9H12N2OS	1.47717	0.0154127	1.05836	128300	130496	133507	127480	123008	124187	128425	119699	120133	116923	116427	123078
Dinoseb	69953	Benzenoids	Phenols	Nitrophenols	C10H12N2O5	1.06813	0.0251233	1.05719	61898.7	61381	59779.5	61075.7	62273.8	63483.6	59742.3	54414.4	56036.1	58782.2	58369.3	62537.4
3-hydroxyundecanoyl carnitine	HMDB0061637	Lipids and lipid-like molecules	Fatty Acyls	Fatty acid esters	C18H35NO5	1.17983	0.027157	1.05362	97633.9	93389.5	95443	89123.5	92178.9	91685.3	89924.4	82114.3	88359.2	89635.6	88985.1	91966.1
8-Isoquinoline methanamine (hydrochloride)	45036	Unclassified	Unclassified	Unclassified	C11H11N	1.21309	0.0185464	1.04964	106843	107710	107949	102537	99294.6	103410	102461	95763	100525	98194.4	98841	102274
8-O-Methyloblongine	HMDB0034579	Organoheterocyclic compounds	Isoquinolines and derivatives	Benzylisoquinolines	C20H26NO3+	1.15142	0.0155905	1.04839	78520.6	78622.3	81346.1	83544.3	83263.7	81590.4	78853.7	79742.4	77285.1	73229.1	78305.6	77000.1
Sodium Tetradecyl Sulfate	HMDB0014607	Organic acids and derivatives	Organic sulfuric acids and derivatives	Sulfuric acid esters	C14H30O4S	2.05875	0.00905797	1.04505	238618	235219	233905	240268	247777	245950	233257	227339	227963	223014	229053	238955
1,2-Diacylglycerol-LD-PI-pool	HMDB0062270	Benzenoids	Benzene and substituted derivatives	Unclassified	C7H5NO	6.61254	0.0072856	0.919845	1.26477e+06	1.31271e+06	1.2752e+06	1.27463e+06	1.24326e+06	1.25225e+06	1.50198e+06	1.4178e+06	1.37713e+06	1.35053e+06	1.37124e+06	1.26839e+06
Orciprenaline	HMDB0014954	Benzenoids	Phenols	Benzenediols	C11H17NO3	1.48781	0.0114952	0.808336	28593.7	26536.6	22554.7	21443.3	26064.2	23288.3	32070.6	26728.7	33134.2	30843	35308.4	25602
OOB-PC	LMGP20010025	Lipids and lipid-like molecules	Glycerophospholipids	Oxidized glycerophospholipids	C30H56NO9P	1.07095	0.0329689	0.790239	19712.2	11925.4	12609.5	15530.4	12747.7	10217.7	16031	15754.6	18422.6	17974.5	19132.2	17391.3
Aconitic acid	3300	Organic acids and derivatives	Carboxylic acids and derivatives	Tricarboxylic acids and derivatives	C6H6O6	1.23122	0.0105656	0.780978	12675.1	16607.3	16672.8	12571.5	14832.1	14412.4	16772.7	18715	17947.6	18606.2	23809.9	16535
Sinalbin B	91693	Organoheterocyclic compounds	Indoles and derivatives	Indoles	C12H12N2OS2	1.10685	0.0150851	0.763028	13173.6	13751.2	13561.5	8317.47	12249.2	11146.2	15062.3	13125.8	13098.5	17448.3	17335.3	18551.8
S-Lactoylglutathione	HMDB0001066	Organic acids and derivatives	Carboxylic acids and derivatives	Amino acids, peptides, and analogues	C13H21N3O8S	1.15481	0.039742	0.73242	9319.2	9277.88	12600.3	10200.5	9561.51	10867.7	13661.9	10834.1	12859.2	17511.4	19412.2	10136.1
Genistein 4'-glucuronide-7-sulfate	HMDB0240520	Phenylpropanoids and polyketides	Isoflavonoids	Isoflavonoid O-glycosides	C21H18O14S	1.46346	0.0129621	0.728123	22392	19566.9	14849.3	14467.9	13148.1	12530.7	19236.2	18725.1	22176.1	23196.1	26667.1	23156.4
Isocitrate	3328	Organic acids and derivatives	Carboxylic acids and derivatives	Tricarboxylic acids and derivatives	C6H8O7	8.1823	0.01315	0.717393	659275	594701	434087	373017	357930	368843	622431	538092	684188	660812	755747	624822
UDP-L-rhamnose	62924	Nucleosides, nucleotides, and analogues	Pyrimidine nucleotides	Pyrimidine nucleotide sugars	C15H24N2O16P2	2.08521	0.0248836	0.714582	45166.5	42673.8	29399.6	25815.6	25162.1	23593.2	39184.4	34895.8	43825.1	49893.4	54595.2	46029.7
Omethoate	72448	Unclassified	Unclassified	Unclassified	C5H12NO4PS	3.19139	0.000493665	0.703597	63045.7	64420.2	58336.2	53246.3	66151.9	39224.7	83662.3	88761.7	86964.2	79781.8	77347.2	73003
2-hydroxy-3-(sulfooxy)benzoic acid	HMDB0134105	Organic acids and derivatives	Organic sulfuric acids and derivatives	Arylsulfates	C7H6O7S	1.03705	0.0243596	0.691478	8313.15	5787.92	10291.5	5465.23	10329.6	5500.13	9813.88	8099.07	10042.6	12217.1	13968.7	11931
gamma-Glutamyltryptophan	HMDB0029160	Organic acids and derivatives	Carboxylic acids and derivatives	Amino acids, peptides, and analogues	C16H19N3O5	1.00892	0.0149701	0.675599	4685.7	6478.93	5802.19	7234.33	3821.83	7089.86	9578.74	10636.9	7296.13	7886.73	10603.8	5970.66
Succinic anhydride	HMDB0032523	Organic acids and derivatives	Carboxylic acids and derivatives	Dicarboxylic acids and derivatives	C4H4O3	2.35147	0.0228554	0.675359	30397	49470.6	17585.3	33037.3	28852.8	39333.6	49942.8	41980.4	50961.1	51175.5	64544.4	35575.3
Quercetin 3-glucoside-3'-sulfate	LMPK12112280	Lipids and lipid-like molecules	Polyketides	Flavonoids	C21H20O15S	1.05637	0.0207629	0.669649	6813.23	10439.1	3918.21	6864.91	5468.7	7702.76	9351.36	8347.14	10741.8	9238.6	14204.7	9651.45
Malic acid	118	Organic acids and derivatives	Hydroxy acids and derivatives	Beta hydroxy acids and derivatives	C4H6O5	4.54777	0.0435359	0.669446	149235	161938	123995	125140	117626	132078	164961	161398	169999	189386	339907	184324
2,5-Diamino-6-(5'-triphosphoryl-3',4'-trihydroxy-2'-oxopentyl)-amino-4-oxopyrimidine	HMDB0006823	Organic oxygen compounds	Organooxygen compounds	Carbohydrates and carbohydrate conjugates	C9H18N5O14P3	2.12591	0.00100255	0.665622	29000	26827	19427.3	18604.4	19010.7	19739.9	30960.3	30032.9	34068.4	30656.4	40213.5	33294.7
Frutinone A	67347	Unclassified	Unclassified	Unclassified	C16H8O4	3.23862	0.00742253	0.648731	73317.1	71421.1	46064.6	40374.2	39919.3	39305.2	71745.1	60090.6	79533.4	86644.1	96430.6	84031
Cassiamin C	68236	Unclassified	Unclassified	Unclassified	C30H18O8	3.7654	0.0178662	0.639014	114162	100699	67271.7	50318.3	51025.5	49161.5	99998.8	80905.6	107580	128510	137562	122482
2,5-Diaminopyrimidine nucleoside triphosphate	HMDB0006821	Organic oxygen compounds	Organooxygen compounds	Carbohydrates and carbohydrate conjugates	C9H18N5O14P3	1.22822	0.010326	0.623387	6122.38	10873.6	3031.4	7625.96	6181.44	8112.69	11834.3	10277.4	12826.2	9706.12	13962.9	8682.72
2-Hydroxy-1,4-benzoquinone	66588	Unclassified	Unclassified	Unclassified	C6H4O3	1.27709	0.0231724	0.621901	10418.4	11599.9	7047.23	7021.21	6953.96	8273.09	10177.5	10577.4	11424.9	12897.2	21435.1	15999
5,6-Indolequinone-2-carboxylic acid	63501	Unclassified	Unclassified	Unclassified	C9H5NO4	1.60422	0.0299323	0.609204	19505.3	10024.1	15150.7	11452.3	12090.1	7393.01	13304.4	14712.5	17583.5	25184.3	30237.9	23099.2
Candletoxin A	67401	Unclassified	Unclassified	Unclassified	C35H44O9	1.53729	0.0398895	0.599522	13885.9	13572.1	14555.6	7177.55	12924.5	3483.65	21909.7	9759.7	22620.3	25028.7	12432.8	17668.1
Fonofos	72746	Unclassified	Unclassified	Unclassified	C10H15OPS2	1.60256	0.0310457	0.594656	11854.4	14647.6	9708.41	13397.3	10423.2	12586.6	13526	16766.3	17727.5	18591.5	35776.4	19729.1
Tyrosol 4-sulfate	96137	Organic acids and derivatives	Organic sulfuric acids and derivatives	Arylsulfates	C8H10O5S	2.06955	0.0195116	0.551427	28132.7	25130	12082.9	8100.1	7612.58	8180.57	25180.9	18555.9	26243.1	32336.1	32752.1	26764.6
Cefuroxime	HMDB0015244	Organoheterocyclic compounds	Lactams	Beta lactams	C16H16N4O8S	2.34721	0.0398279	0.550365	26078.7	29270.5	18499.7	18249.5	17768.7	23346.1	25836	32549.7	31124.4	37456.5	76223.5	38855
Adenosine 3'-monophosphate	63401	Nucleosides, nucleotides, and analogues	Ribonucleoside 3'-phosphates	Unclassified	C10H14N5O7P	3.57754	0.0225963	0.531414	73869.9	55950.1	44150.3	46759.8	14880	10216.9	78377.9	92908	108544	69346.6	68775.8	44637.2
Hydroxyanthraquinone	65876	Unclassified	Unclassified	Unclassified	C14H8O3	2.62336	0.0332749	0.516586	27372.5	34282.3	18110.8	18591.6	19404	22188.2	28882.6	33363.8	34227.6	45302.7	85409.2	43726
deoxyguanosine 5'-monophosphate (dGMP)	3489	Unclassified	Unclassified	Unclassified	C10H14N5O7P	1.93845	0.0211348	0.513883	21722.4	13348.1	13271.9	12982.2	4208.05	2887.86	19480.5	26840.1	33078.9	19850.9	20056	13837.9
Kolaflavanone	HMDB0253817	Lipids and lipid-like molecules	Polyketides	Flavonoids	C31H24O12	2.12436	0.0496089	0.467663	13148.4	11750.7	8305.51	15623.1	19584.1	13019.9	17877.5	16385.7	23219.4	29805.9	61190.1	25646
4-(4-Hydroxyphenyl)-2-butanone O-[2,6-digalloylglucoside]	93898	Organic oxygen compounds	Organooxygen compounds	Carbohydrates and carbohydrate conjugates	C30H30O15	3.36957	0.0421566	0.453006	29783.1	24688.6	23760	31746.3	43313	35159.5	37952.9	41882.2	48837.2	80773.4	142662	63892.4
Stercobilinogen	HMDB0004157	Organoheterocyclic compounds	Tetrapyrroles and derivatives	Bilirubins	C33H48N4O6	1.70254	0.0329661	0.417561	8492.09	9018.2	6.634e-06	13480.1	6.634e-06	5406.94	8908.49	18465.2	17202.6	20186.8	18251.1	4152.37
Judeol	90070	Lipids and lipid-like molecules	Prenol lipids	Sesquiterpenoids	C46H60O14	1.61334	0.0100233	0.416798	10567.4	3826.18	6.634e-06	7125.28	516.623	9193.95	13140.4	12119.6	10233	11438.6	18892.8	9102.62
3-Indolepropionic acid	6602	Organoheterocyclic compounds	Indoles and derivatives	Indolyl carboxylic acids and derivatives	C11H11NO2	1.18625	0.0408328	0.40773	7509.77	822.446	1256.4	3599.57	1190.95	4681.33	4090.8	6844.45	3557.78	11670.3	13570.1	7014.36
Dehydro-L-(+)-ascorbic acid dimer	45119	Unclassified	Unclassified	Unclassified	C12H12O12	1.13443	0.0496202	0.396624	1830.38	3605.58	1498.96	3709.57	2412.81	4291.7	4784.18	6379.87	5191.86	5245.68	16803.8	5336.23
Aflatoxin M1	71316	Phenylpropanoids and polyketides	Coumarins and derivatives	Furanocoumarins	C17H12O7	1.24565	0.0396053	0.372786	3035.98	1158.51	2006.55	5208.69	1372.58	4193.66	4651.73	4720.53	3827.42	15554.9	10904.3	5879.17
(+)-Myristinin A	LMPK12020229	Lipids and lipid-like molecules	Polyketides	Flavonoids	C33H40O7	1.30214	0.0238192	0.357214	7377.97	3977.06	67.0674	2607.91	6.634e-06	1626.74	4662.26	6980.34	6879.86	12056.8	10069.6	3181.25
Digalacturonate	63147	Organic oxygen compounds	Organooxygen compounds	Carbohydrates and carbohydrate conjugates	C12H18O13	1.19702	0.0160332	0.349221	2473.81	2527.18	1100.54	2986.97	2070.66	2112.72	3889.53	3907.61	5834.21	6322.94	13043	5006.94
p-Hydroxytiaprofenic acid	2845	Unclassified	Unclassified	Unclassified	C14H12O4S	4.62402	0.0212663	0.34795	39606.5	15103	23160.1	50641.3	14526.6	51449.8	60700.6	67285.8	50381.4	181126	131708	67749.1
Equol 4'-O-glucuronide	HMDB0041731	Phenylpropanoids and polyketides	Phenylpropanoic acids	Unclassified	C21H22O9	1.19083	0.0348242	0.346984	4422.69	883.15	1725.73	2768.6	911.797	3224.16	2825.46	3831.76	3897.58	11660.3	12165.6	5782.96
2-Isopropyl-3-oxosuccinate	HMDB0012149	Organic acids and derivatives	Keto acids and derivatives	Short-chain keto acids and derivatives	C7H10O5	2.04181	0.0491109	0.338112	14655.1	406.619	4974.17	10998.4	7331.27	2210.3	8294.89	20102.9	17006.8	23626.5	43992.3	6983.64
Demethyllactenocin	63713	Unclassified	Unclassified	Unclassified	C37H61NO14	1.11171	0.00726178	0.30939	3564.31	790.315	6.634e-06	2498.54	6.634e-06	2131.67	3845.31	7144.02	6001.57	4309.7	6020.21	1719.72
dIDP	58159	Nucleosides, nucleotides, and analogues	Purine nucleotides	Purine deoxyribonucleotides	C10H14N4O10P2	1.20905	0.0190902	0.296898	2258.14	558.654	1279.55	2682.87	667.382	3000.27	3789.24	3952.69	2984.13	11891.9	8160.29	4408.51
L-Metanephrine	HMDB0062493	Benzenoids	Phenols	Methoxyphenols	C10H15NO3	1.10428	0.0119919	0.245097	1576.94	1730.51	32.0671	1518.88	44.4297	1272.49	2409.73	4852.51	4241.84	7954.2	4845.3	891.808
Isopropalin	72811	Unclassified	Unclassified	Unclassified	C15H23N3O4	1.07316	0.00597733	0.174231	1119.33	1134.08	6.634e-06	850.931	6.634e-06	610.653	1873.15	5447.49	3884.82	5816.52	3647.7	652.567
